# Supplementary material
Source: PubMed Central journal article supplement (PMC9790038)
Supplement: NIHMS1845202-supplement-fS2.pdf [file NIHMS1845202-supplement-fS2.pdf]

## Supplemental Figure S2:

### Publication Country

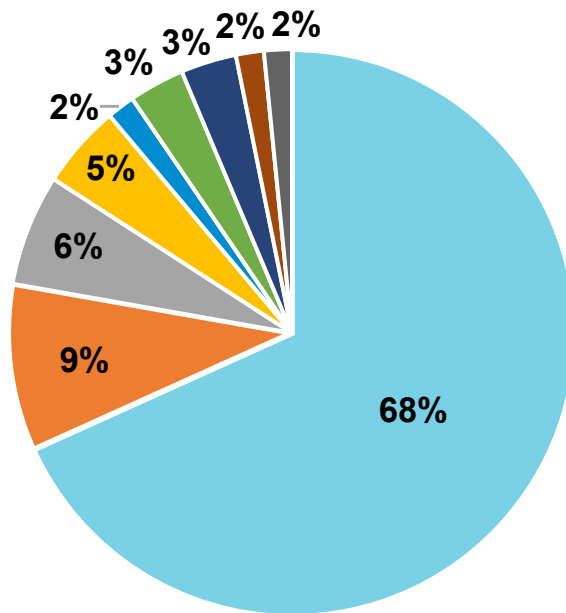

■ US ■ UK ■ Nigeria ■ Brazil ■ Italy ■ Canada ■ France ■ Saudi Arabia ■ Jamaica
