# Supplementary material
Source: PubMed Central journal article supplement (PMC9790038)

## Supplemental Figure S1:

### Publication Year

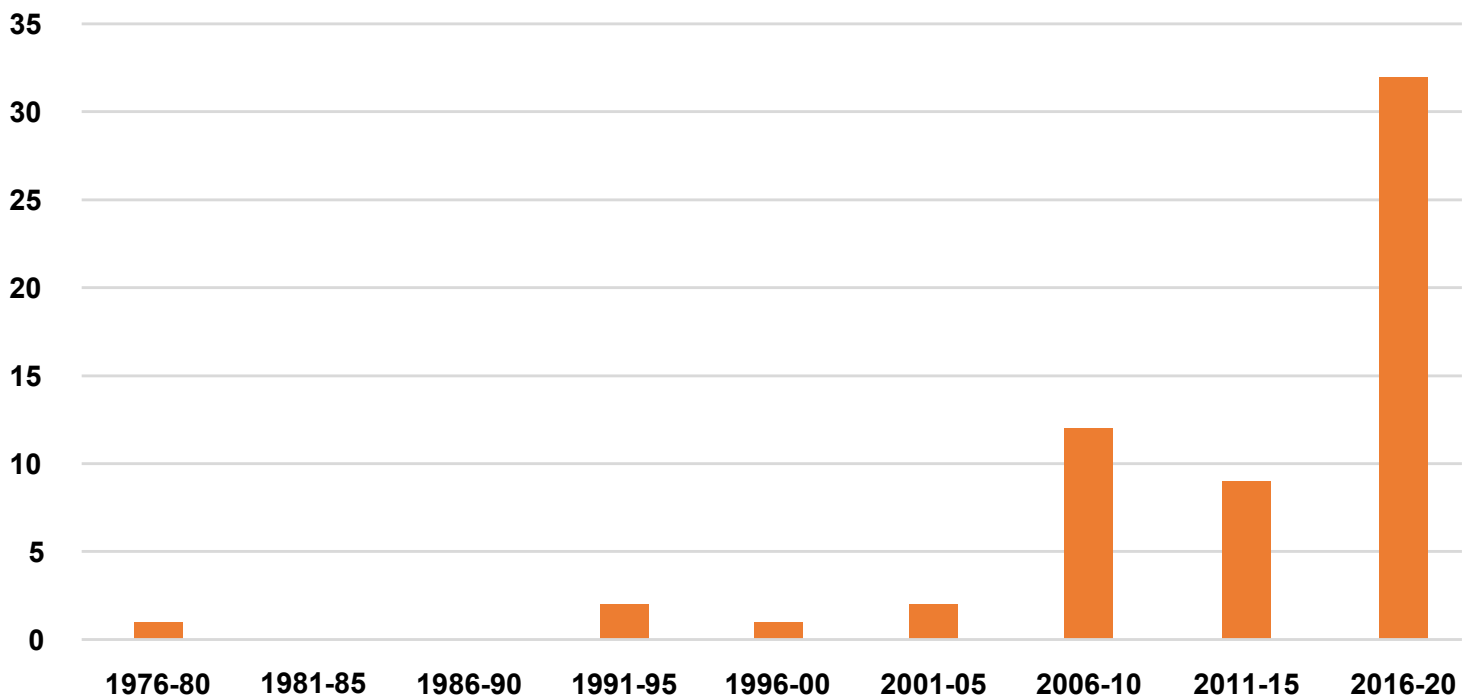

Supplement: NIHMS1845202-supplement-fS1.pdf [file NIHMS1845202-supplement-fS1.pdf]
